# Supplementary material for: Convalescent plasma associates with reduced mortality and improved clinical trajectory in patients hospitalized with COVID-19
Source: JCI journal article supplement (doi:10.1172/jci151788), 2021-08-31
Supplement: sd1 [file 1]

## Supplemental material

### Supplemental material index

**Supplemental methods.** *Patient encounters, Comparison group pseudo-baseline assignment, Epoch intervals for evolving treatment recommendations, Matching and covariates*

**Supplemental Figure 1.** Distribution frequencies of CP transfusions by calendar date

**Supplemental Figure 2.** Distribution frequencies of days from admission to transfusion with CP

**Supplemental Tables 1-3. Pre-match and post-match tables for the WHO PS-matched model.** Frequencies and distributions of characteristics, comorbid conditions, and admission and baseline laboratory results pre- and post-matching for both CP and comparison groups.

**Supplemental Table 1.** Demographics for WHO PS-matched model

**Supplemental Table 2.** Clinical characteristics for WHO PS-matched model

**Supplemental Table 3.** Admission and baseline biomarkers for WHO PS-matched model

**Supplemental Tables 4-5. Variable description of epoch intervals.** Frequencies and distributions of characteristics, comorbid conditions, and admission and baseline laboratory results over key calendar epochs for patients hospitalized with COVID-19.

**Supplemental Table 4.** Demographic description of epoch intervals.

**Supplemental Table 5.** Clinical description of epoch intervals.

**Supplemental Table 6. Transfusion-related adverse events.** Counts and frequencies of transfusion-related adverse events reported for three COVID-19 hospitalized registry subgroups including those transfused with CP (N=8,775), those transfused with fresh frozen plasma (FFP; N=663), and those not transfused with either CP or FFP blood products (Non-CP, Non-FFP; N=27,846).

**Supplemental Table 7. Effects and interactions of serology in the CP cohort.** Results of the exploratory analyses on the relationship of serology levels with all-cause, in-hospital mortality in the CP cohort only where serology data was provided (N=1944). In a Cox regression models, serology levels as measured by the VITROS® CoV2T S/Co were treated as continuous and ordinal by 20<sup>th</sup> and 80<sup>th</sup> percentiles for low, medium and high trend assessment. Further analyses looked at the interaction of serology level with days from

admission to transfusion (N=1939). Simple slope analyses were conducted for the decomposition of the significant interaction two separate ways: to examine the impact of high serology versus low serology across number of days from admission to transfusion, and to examine the impact of 0-3 days to transfusions versus 4+ days to transfusion across level of serology.

**Supplemental Table 8. Medication list by categories.** Description of medications that were included into each medication category.

**Supplemental Table 9. Calendar epoch intervals.** Definitions of six calendar epochs used to account for changes in HCA treatment recommendations for patients hospitalized with COVID-19 over time in 2020.

**Supplemental Table 10. WHO progression score (WHO PS) categories.** List defining the modified 6-point WHO progression score categories (WHO PS) used to match for baseline disease severity.

## Supplemental methods

*Patient encounters.* For patients that had multiple hospital admissions within the date range of the data pull, we identified the longest encounter that was within the determined window of the first positive SARS-CoV-2 test and proceeded to link encounters, before and/or after, that were within 36 hours of that longest encounter's admission and discharge times to create a continuum of care to adequately evaluate the disease course. For the CP group, the anchoring encounter included the first transfusion date of CP and before and after encounters within 36 hours were linked as already described.

*Comparison group pseudo-baseline assignment.* The day of the first CP transfusion was considered baseline (day 0) for the CP group. The comparison group was automatically assigned a pseudo-baseline prior to matching that reflected equal distribution of the time interval from admission to transfusion as the CP group. Since the distribution of baseline dates was randomly assigned, there was a potential to assign a pseudo-baseline after a patient's discharge date. To minimize this issue, we stratified the sample into different treatment epoch intervals before assigning the pseudo-baseline to the comparison group (Table S5). We removed any comparison patients that were discharged prior to their assigned pseudo-baseline (Figure 1)

*Epoch intervals for evolving treatment recommendations.* The time interval from admission to CP transfusion decreased over time when investigating calendar dates. To account for this shift, we created date ranges that aligned with updates in HCA treatment recommendations which resulted in six epoch intervals which including March 2 to April 2, April 3 to April 29, April 30 to May 19, May 20 to July 5, July 6 to August 23, and August 24 to September 28. For an in-depth description of these clinico-demographic shifts, see Table S2. Additionally, we used epoch interval as a matching variable in our analyses. Since there were still major shifts in treatment approaches and hotspots for COVID19 cases within each epoch interval, we also included a covariate of a numerated calendar date for patient admission.

*Matching and covariates.* A variety of patient characteristics were captured at baseline that were considered for matching criteria. Demographic characteristics included age, sex, and race/ethnicity. Age ranges were grouped 18-44, 45-64, 65-74, 75-84, and over 84 (1). Baseline severity was matched on either the 6-point WHO PS, where only 2 to 5 were possible at baseline, or baseline RTRM probabilities in increments of 0.10. Additional clinical characteristics were included in matching such as preadmission comorbidities (as detailed below), admission epoch interval, and intubation during hospitalization. Due to missingness of smoking status (~20%), we provided these data descriptively but excluded them from inferential analyses. Body mass index was found to be unreliably reported, especially for non-ambulatory patients, so it was excluded from all evaluations.

Covariates for models were considered for patient data that were related to the hospital stay. Treatment characteristics included pharmacy data: in-hospital administration of other medications inclusive of anticoagulants, statins/ACEi, steroids, other immunomodulators, antivirals, antibiotics, remdesivir, hydroxychloroquine (HCQ), tocilizumab, and azithromycin (Table S4), where ACEi is Angiotensin converting enzyme inhibitors. Azithromycin was considered a separate medication grouping from antibiotics because it was often used in conjunction with HCQ and/or for its additional anti-inflammatory properties. SARS-CoV-2 monoclonal antibodies were not authorized (EUA) for use in hospitalized patients prior to our data pull so no instances of monoclonal infusion occurred in our cohort (2). Medications were computed as indicators of usage over the length of hospitalization. Secondary infections were considered such as bacterial pneumonia, sepsis, and severe sepsis but were included in the RTRM calculations and, thus, were not included in the RTRM-matched models. However, secondary infections were included as covariates in the WHO PS-matched models. Although epoch intervals were included in the matching criteria, we included numerated calendar date as a covariate to account for the fluctuations within the epoch intervals. Finally, since all inferential analyses started with day 0 at transfusion date/pseudo-baseline, the number of days from admission to baseline was also included in the models as a covariate.

Comorbidities included in the RTRM were based on the Charlson Comorbidity Index and included diabetes with chronic complications, diabetes without chronic complications, all-inclusive diabetes, hypertension, chronic ischemic heart disease, congestive heart failure, renal disease (mild or moderate), renal disease (severe), asthma or reactive airway disease, chronic pulmonary disease (excluding asthma), HIV infection, cancer (including solid tumors and blood cancers but excluding non-melanoma skin cancer), and recently diagnosed cancer within two years of admission date (3, 4). For the current analyses, we also accounted for both organ-specific and systemic autoimmune diseases (5).

*Analytic Software.* All analyses were performed using R v3.6.3 with the following packages: “cem”, “survival”, "coxme", "lme4" (6). The pseudo-baseline assignment was conducted using an automated macro in SAS 9.4 (SAS Inc., Cary NC) (7).

## Supplemental references

1. Yoon HA, Bartash R, Gendlina I, Rivera J, Nakouzi A, Bortz RH, 3rd, et al. Treatment of severe COVID-19 with convalescent plasma in Bronx, NYC. *JCI Insight*. 2021 Feb 22;6(4):e142270. doi: 10.1172/jci.insight.142270.
2. United States Food and Drug Administration (FDA). Coronavirus (COVID-19) Update: FDA Authorizes Monoclonal Antibodies for Treatment of COVID-19. <https://www.fda.gov/news-events/press-announcements/coronavirus-covid-19-update-fda-authorizes-monoclonal-antibodies-treatment-covid-19-0>. Updated 02/09/2021 Accessed 04/27/2021, 2021.
3. Glasheen WP, Cordier T, Gumpina R, Haugh G, Davis J, and Renda A. Charlson Comorbidity Index: ICD-9 Update and ICD-10 Translation. *Am Health Drug Benefits*. 2019;12(4):188-97.
4. Schlauch D, Fisher AM, Correia J, Fu X, Martin C, Junglen A, et al. Development of a Real-Time Risk Model (RTRM) for Predicting In-Hospital COVID-19 Mortality. *medRxiv*. 2021.04.26.21256138; doi: <https://doi.org/10.1101/2021.04.26.21256138>.
5. Aribi M. Immunopathogenesis and Immune-based Therapy for Selected Autoimmune Disorders. *IntechOpen*; March 2017. eBook (PDF) ISBN: 978-953-51-5479-2
6. R Core Team (2020). R: A language and environment for statistical computing. R Foundation for Statistical Computing. Vienna, Austria; 2020. <https://www.R-project.org/>.
7. Harvey H, Jankus DD, and Mosley D. United Healthcare. Random assignment of proxy event dates to unexposed individuals in observational studies: An automated technique using SAS. Midwest SAS Users Group (MSUG); 2012. <https://www.mwsug.org/proceedings/2012/PH/MWSUG-2012-PH02.pdf>.

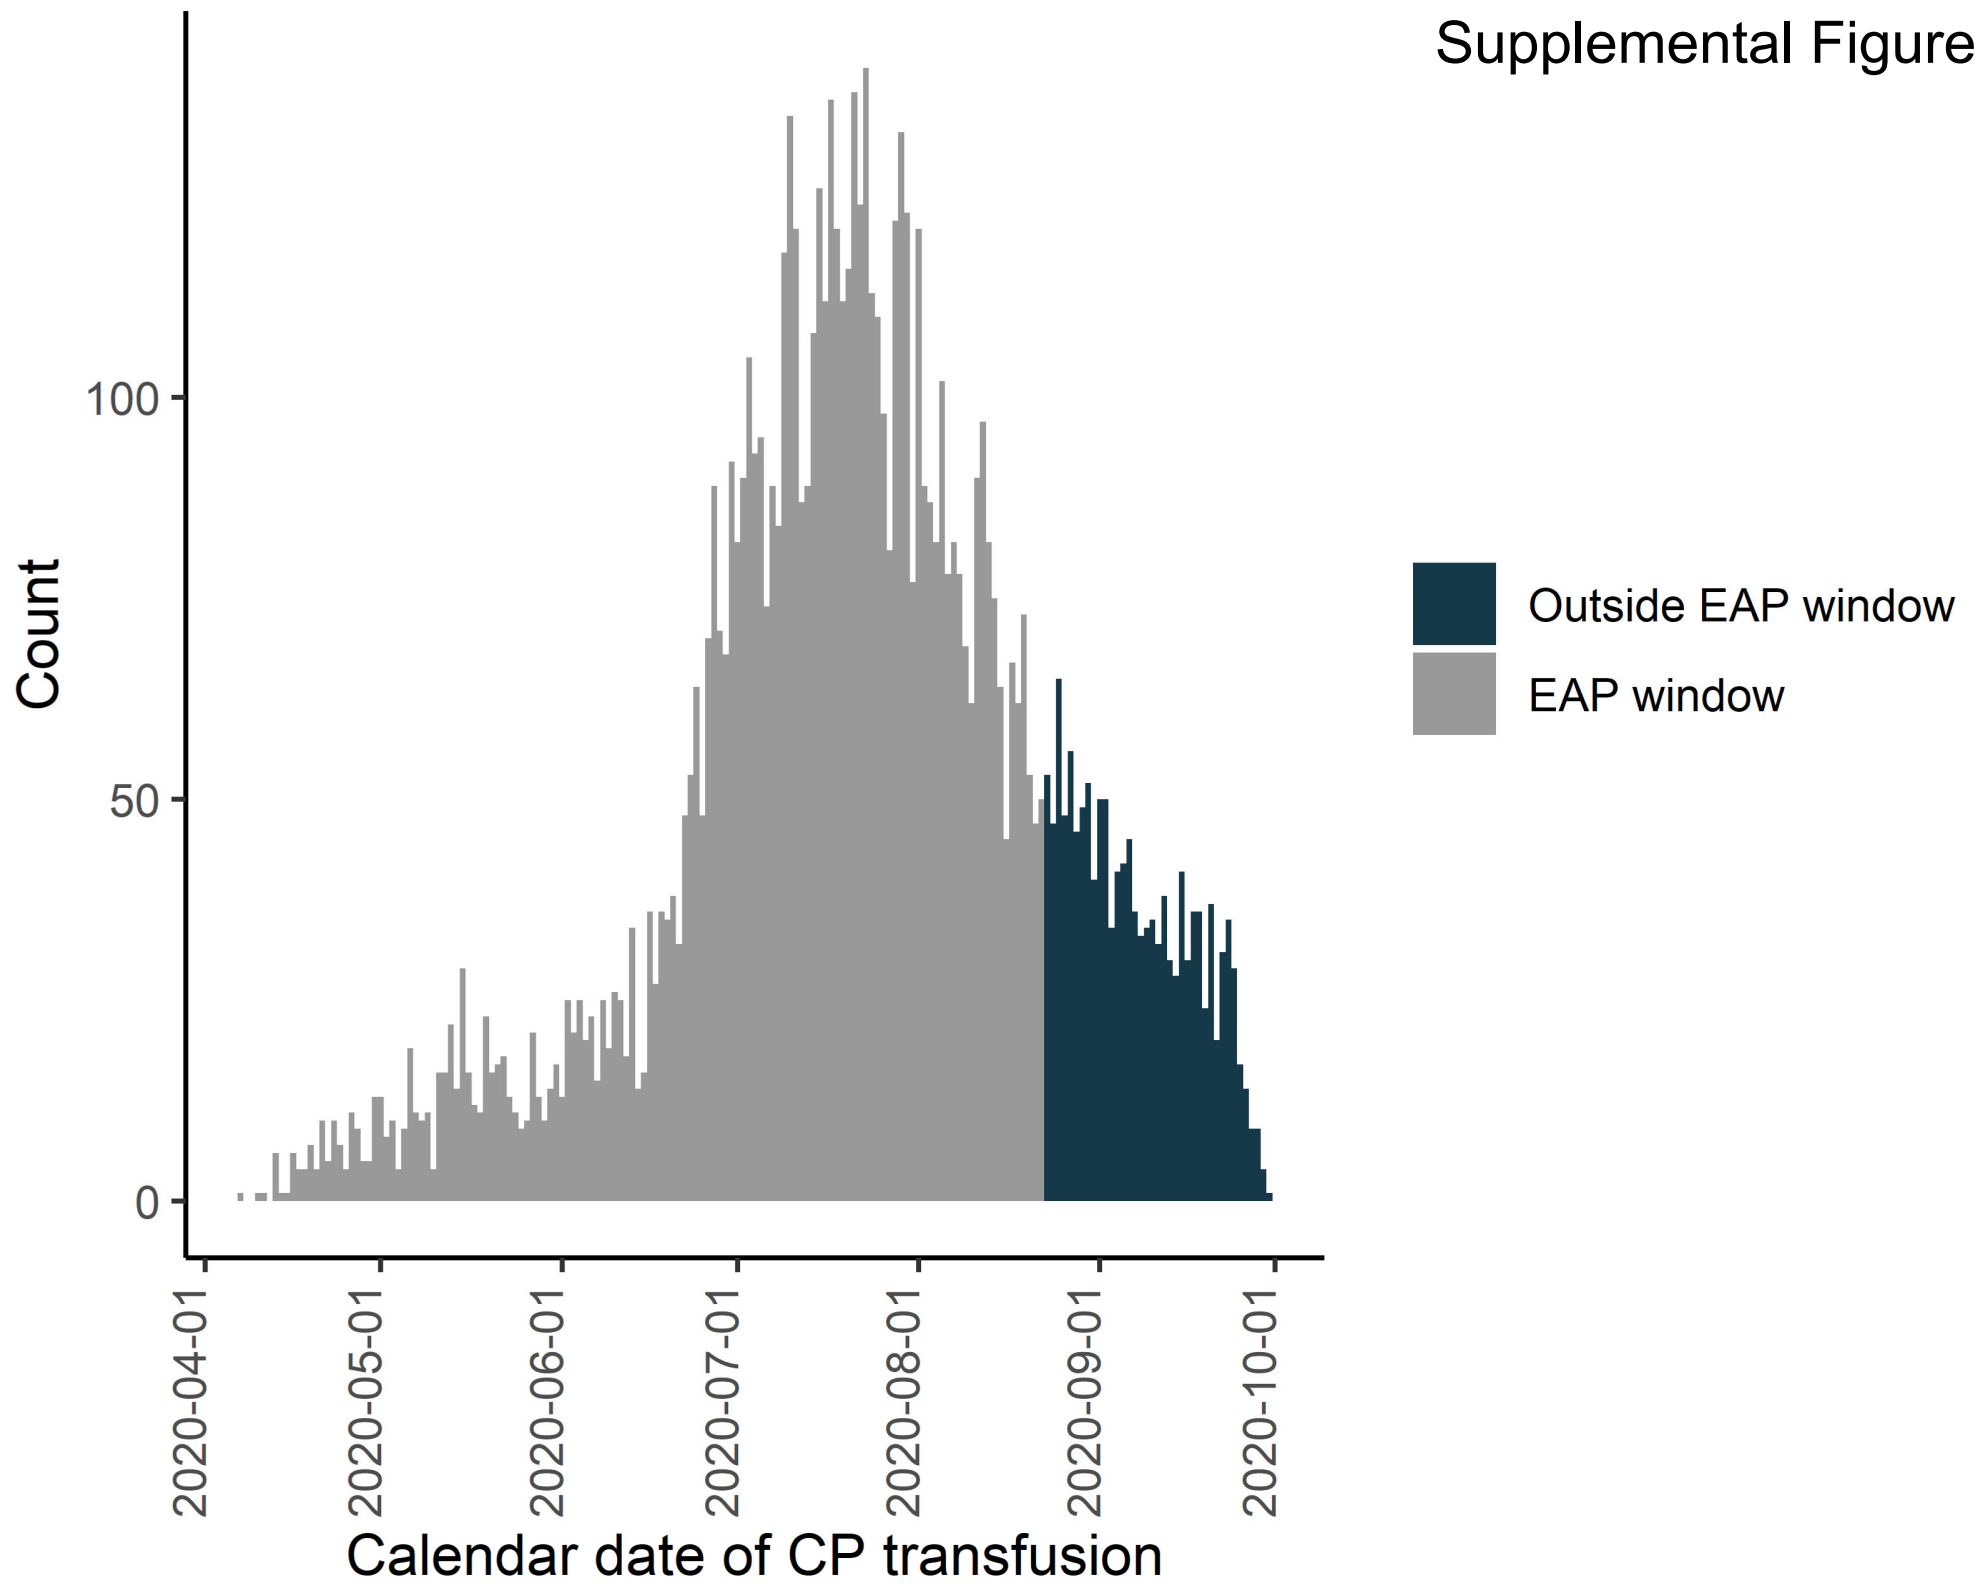

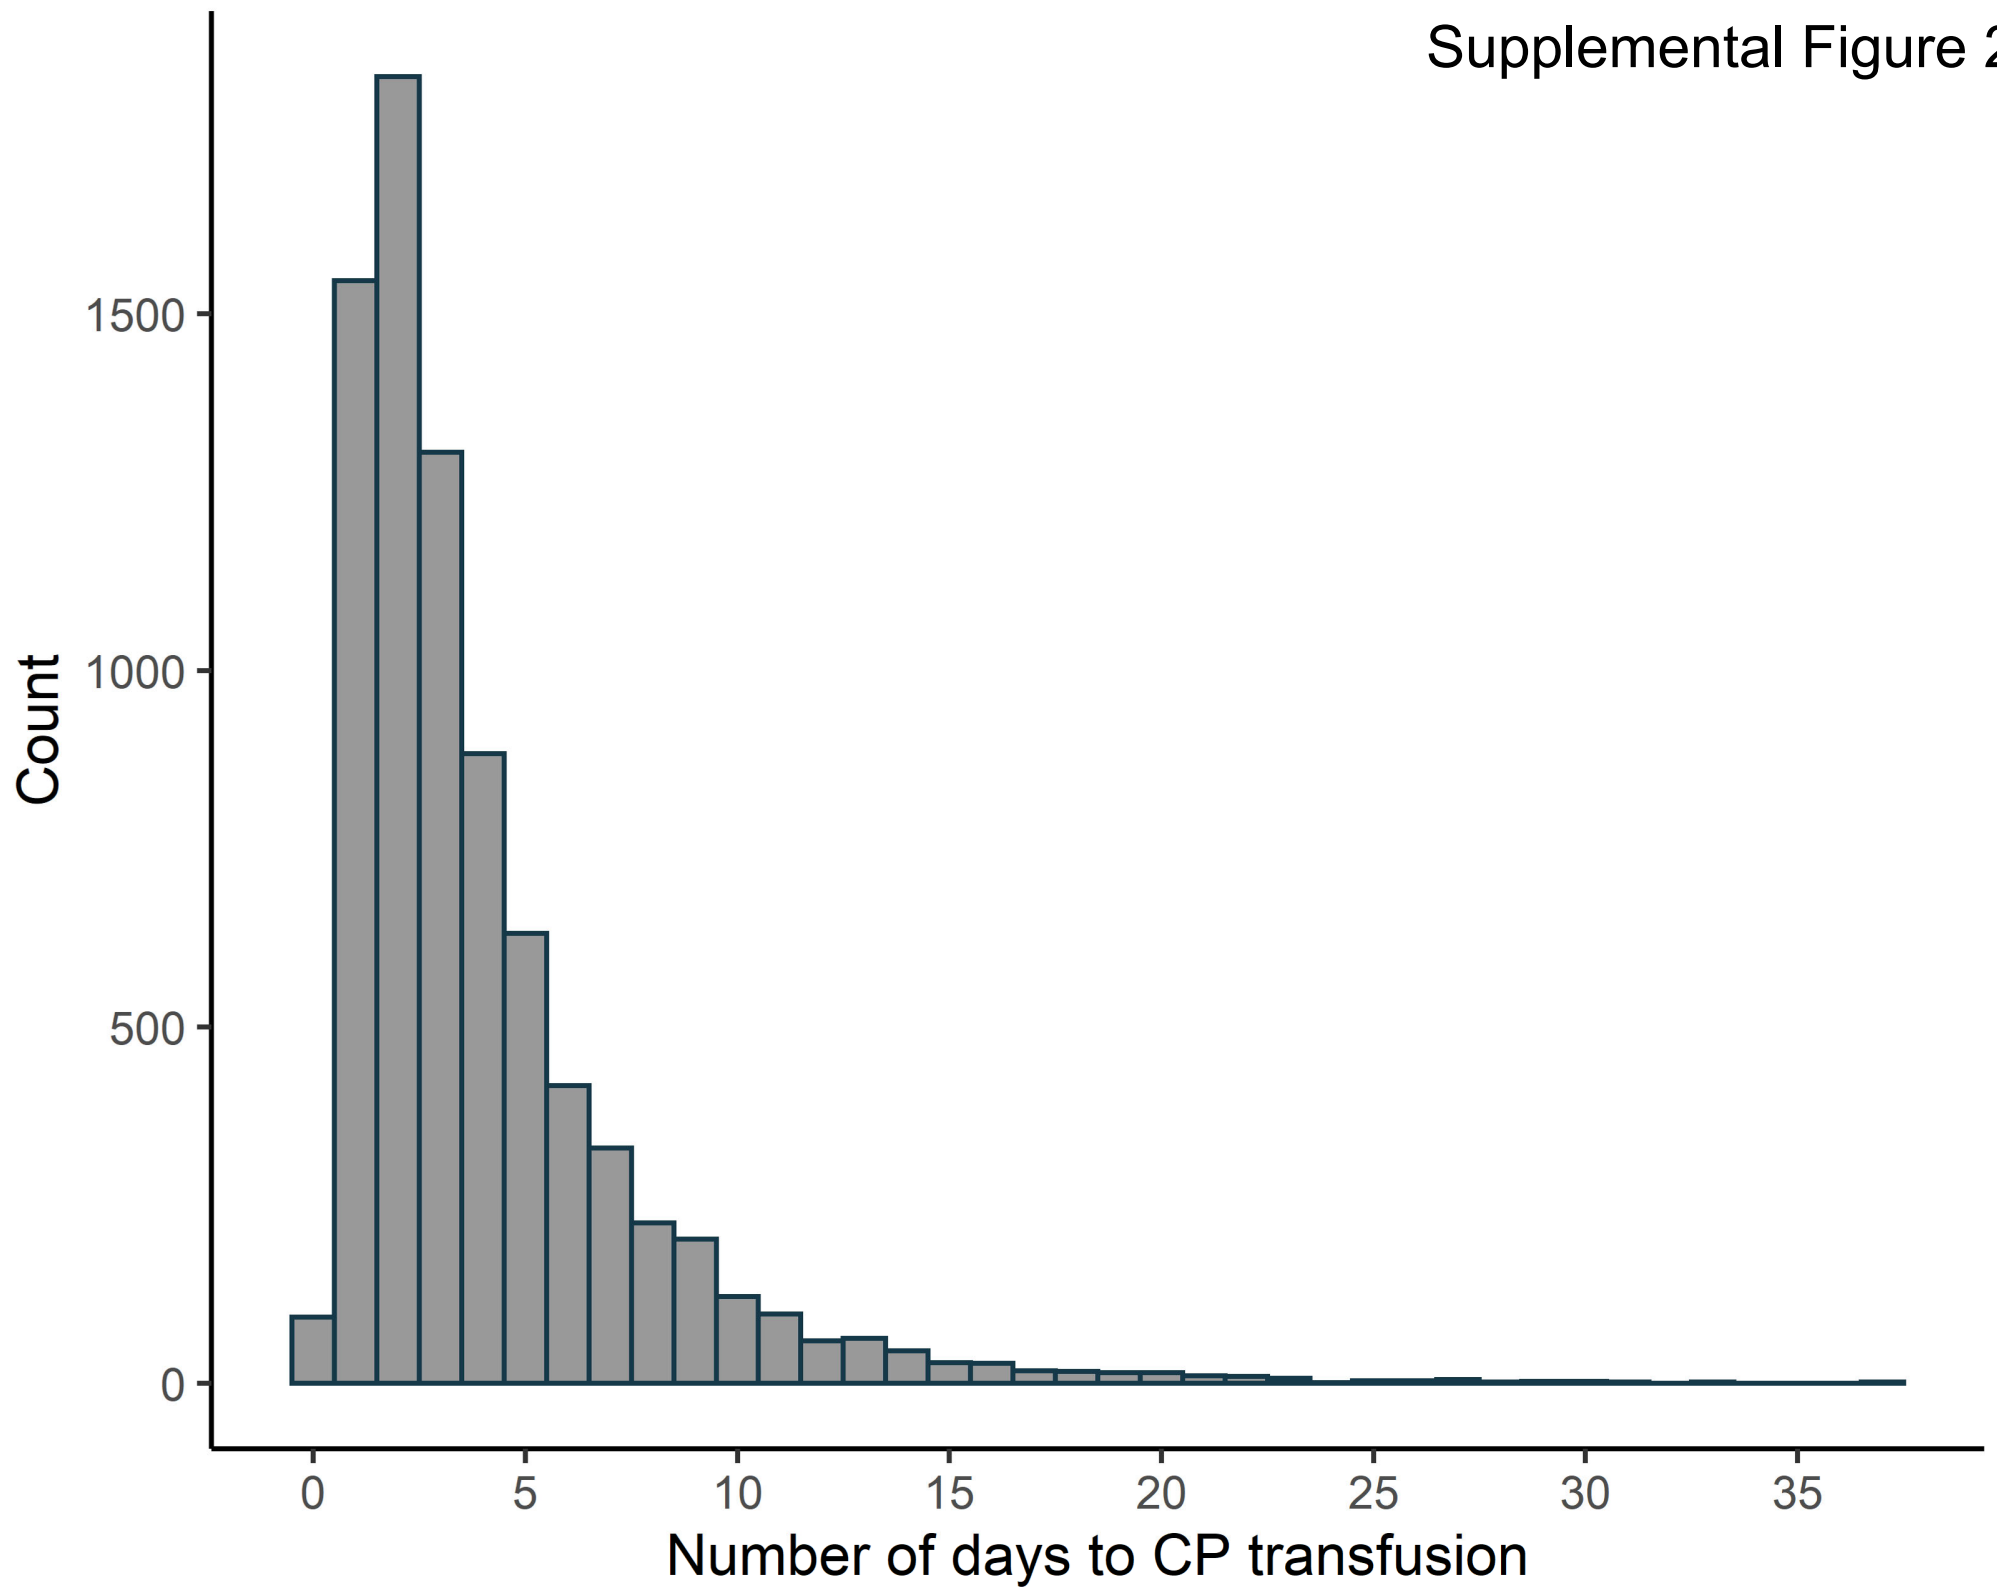

## Supplemental tables

Supplemental Table 1. Demographics for WHO PS-matched model

|                                                 | Pre-match CP | Pre-match comparison | Post-match CP | Post-match comparison |
|-------------------------------------------------|--------------|----------------------|---------------|-----------------------|
| <b>Total number of patients, N</b>              | 7419         | 22234                | 4337          | 8708                  |
| <b>Age groupings<sup>M</sup></b>                |              |                      |               |                       |
| 18-44                                           | 955 (12.9%)  | 3544 (15.9%)         | 680 (15.7%)   | 1365 (15.7%)          |
| 45-64                                           | 2866 (38.6%) | 7262 (32.7%)         | 1900 (43.8%)  | 3815 (43.8%)          |
| 65-74                                           | 1720 (23.2%) | 4457 (20.0%)         | 857 (19.8%)   | 1721 (19.8%)          |
| 75-84                                           | 1323 (17.8%) | 3999 (18.0%)         | 615 (14.2%)   | 1235 (14.2%)          |
| 85+                                             | 555 (7.5%)   | 2972 (13.4%)         | 285 (6.6%)    | 572 (6.6%)            |
| <b>Race/ethnicity<sup>M</sup></b>               |              |                      |               |                       |
| Hispanic                                        | 3260 (43.9%) | 7242 (32.6%)         | 2153 (49.6%)  | 4323 (49.6%)          |
| Non-Hispanic black                              | 1156 (15.6%) | 5069 (22.8%)         | 560 (12.9%)   | 1124 (12.9%)          |
| Non-Hispanic other <sup>#</sup>                 | 462 (6.2%)   | 1242 (5.6%)          | 215 (5.0%)    | 432 (5.0%)            |
| Non-Hispanic white                              | 2541 (34.2%) | 8681 (39.0%)         | 1409 (32.5%)  | 2829 (32.5%)          |
| <b>Sex<sup>M</sup></b>                          |              |                      |               |                       |
| Female                                          | 3093 (41.7%) | 10986 (49.4%)        | 1733 (40.0%)  | 3480 (40.0%)          |
| Male                                            | 4326 (58.3%) | 11248 (50.6%)        | 2604 (60.0%)  | 5228 (60.0%)          |
| <b>Smoking status</b>                           |              |                      |               |                       |
| Current smoker                                  | 263 (3.5%)   | 1297 (5.8%)          | 134 (3.1%)    | 370 (4.2%)            |
| Former smoker                                   | 1455 (19.6%) | 3888 (17.5%)         | 746 (17.2%)   | 1372 (15.8%)          |
| Never smoker                                    | 4827 (65.1%) | 13277 (59.7%)        | 3002 (69.2%)  | 5706 (65.5%)          |
| Missing                                         | 868 (11.7%)  | 3772 (17.0%)         | 455 (10.5%)   | 1260 (14.5%)          |
| <b>Pre-admission comorbidities</b>              |              |                      |               |                       |
| Asthma or reactive airway disease               | 711 (9.6%)   | 2255 (10.1%)         | 308 (7.1%)    | 604 (6.9%)            |
| COPD (excluding asthma) <sup>M</sup>            | 1430 (19.3%) | 4699 (21.1%)         | 428 (9.9%)    | 859 (9.9%)            |
| Autoimmune disorders                            | 885 (11.9%)  | 2785 (12.5%)         | 104 (2.4%)    | 209 (2.4%)            |
| Organ-related autoimmune disorders <sup>M</sup> | 440 (5.9%)   | 1764 (7.9%)          | 53 (1.2%)     | 106 (1.2%)            |
| Systemic autoimmune disorders <sup>M</sup>      | 510 (6.9%)   | 1275 (5.7%)          | 53 (1.2%)     | 106 (1.2%)            |
| Cancer                                          | 425 (5.7%)   | 1431 (6.4%)          | 52 (1.2%)     | 104 (1.2%)            |
| Cancer (diagnosed in the last 2 years)          | 230 (3.1%)   | 785 (3.5%)           | 28 (0.6%)     | 51 (0.6%)             |
| Chronic ischemic heart disease <sup>M</sup>     | 1556 (21.0%) | 5166 (23.2%)         | 518 (11.9%)   | 1040 (11.9%)          |
| Congestive heart failure <sup>M</sup>           | 1358 (18.3%) | 4589 (20.6%)         | 400 (9.2%)    | 803 (9.2%)            |

|                                                     |              |               |              |              |
|-----------------------------------------------------|--------------|---------------|--------------|--------------|
| Diabetes                                            | 3233 (43.6%) | 9128 (41.1%)  | 1394 (32.1%) | 2783 (32%)   |
| Diabetes with chronic complications                 | 1412 (19.0%) | 4278 (19.2%)  | 453 (10.4%)  | 893 (10.3%)  |
| Diabetes without chronic complications <sup>M</sup> | 1821 (24.5%) | 4850 (21.8%)  | 941 (21.7%)  | 1889 (21.7%) |
| HIV infection                                       | 33 (0.4%)    | 125 (0.6%)    | 12 (0.3%)    | 26 (0.3%)    |
| Hypertension                                        | 4704 (63.4%) | 14733 (66.3%) | 2215 (51.1%) | 4447 (51.1%) |
| Renal disease (mild or moderate) <sup>M</sup>       | 1156 (15.6%) | 3888 (17.5%)  | 388 (8.9%)   | 779 (8.9%)   |
| Renal disease (severe)                              | 495 (6.7%)   | 1372 (6.2%)   | 95 (2.2%)    | 191 (2.2%)   |

Categorical data are N (%) and continuous variables are presented as median [IQR]. IQR=interquartile range;

CP=Convalescent Plasma; COPD=Chronic obstructive pulmonary disease

<sup>M</sup> indicates variables used for CEM matching

<sup>#</sup> other is defined as 60% recorded in the medical record as “other” race where the remaining 40% includes reported race of American Indian/Alaska Native, Asian, Asian Indian, Native Hawaiian/Other Pacific Islander, or multiracial.

**Supplemental Table 2.** Clinical characteristics for WHO PS-matched model

|                                    | Pre-match CP      | Pre-match comparison | Post-match CP     | Post-match comparison |
|------------------------------------|-------------------|----------------------|-------------------|-----------------------|
| <b>Total number of patients, N</b> | 7419              | 22234                | 4337              | 8708                  |
| <b>Medications</b>                 |                   |                      |                   |                       |
| Anticoagulants                     | 7257 (97.8%)      | 19482 (87.6%)        | 4235 (97.6%)      | 8259 (94.8%)          |
| Azithromycin                       | 5462 (73.6%)      | 14061 (63.2%)        | 3180 (73.3%)      | 6424 (73.8%)          |
| Antibiotics – other                | 6731 (90.7%)      | 18453 (83.0%)        | 3823 (88.1%)      | 7677 (88.2%)          |
| Antivirals                         | 165 (2.2%)        | 475 (2.1%)           | 68 (1.6%)         | 133 (1.5%)            |
| Hydroxychloroquine                 | 434 (5.8%)        | 2586 (11.2%)         | 188 (4.3%)        | 316 (3.6%)            |
| Remdesivir                         | 4563 (61.5%)      | 3171 (14.3%)         | 2597 (59.9%)      | 2946 (33.8%)          |
| Tocilizumab                        | 788 (10.6%)       | 561 (2.5%)           | 347 (8%)          | 475 (5.5%)            |
| Statins                            | 2970 (40.0%)      | 8276 (37.2%)         | 1487 (34.3%)      | 2636 (30.3%)          |
| Systemic corticosteroids           | 7017 (94.6%)      | 12951 (58.2%)        | 4115 (94.9%)      | 7307 (83.9%)          |
| Immunomodulators – other           | 12 (0.2%)         | 22 (0.1%)            | 2 (0.0%)          | 4 (0.0%)              |
| <b>Clinical variables</b>          |                   |                      |                   |                       |
| Intubation <sup>M</sup>            | 1302 (17.5%)      | 827 (3.7%)           | 222 (5.1%)        | 446 (5.1%)            |
| All-cause death                    | 1543 (20.8%)      | 1526 (6.9%)          | 505 (11.6%)       | 852 (9.8%)            |
| Baseline RTRM score                | 0.14 [0.04, 0.45] | 0.05 [0.02, 0.13]    | 0.08 [0.02, 0.25] | 0.07 [0.02, 0.20]     |
| <b>Admission WHO PS</b>            |                   |                      |                   |                       |
| WHO PS 2                           | 867 (11.7%)       | 7968 (35.8%)         | 476 (11%)         | 1181 (13.6%)          |
| WHO PS 3                           | 3834 (51.7%)      | 11416 (51.3%)        | 2466 (56.9%)      | 4521 (51.9%)          |



|                                    |              |               |              |              |
|------------------------------------|--------------|---------------|--------------|--------------|
| WHO PS 4                           | 2539 (34.2%) | 2298 (10.3%)  | 1349 (31.1%) | 2807 (32.2%) |
| WHO PS 5                           | 148 (2.0%)   | 278 (1.3%)    | 31 (0.7%)    | 99 (1.1%)    |
| Missing                            | 35 (0.5%)    | 274 (1.2%)    | 15 (0.3%)    | 99 (1.1%)    |
| <b>Baseline WHO PS<sup>M</sup></b> |              |               |              |              |
| WHO PS 2                           | 247 (3.3%)   | 7366 (33.1%)  | 165 (3.8%)   | 331 (3.8%)   |
| WHO PS 3                           | 2510 (33.8%) | 11358 (51.1%) | 1910 (44%)   | 3835 (44%)   |
| WHO PS 4                           | 4011 (54.1%) | 2949 (13.3%)  | 2182 (50.3%) | 4381 (50.3%) |
| WHO PS 5                           | 651 (8.8%)   | 561 (2.5%)    | 80 (1.8%)    | 161 (1.8%)   |
| Missing                            | 0 (0%)       | 0 (0%)        | 0 (0%)       | 0 (0%)       |
| <b>Secondary infections</b>        |              |               |              |              |
| Bacteremia                         | 45 (0.6%)    | 154 (0.7%)    | 20 (0.5%)    | 52 (0.6%)    |
| Bacterial pneumonia                | 434 (5.8%)   | 672 (3.0%)    | 167 (3.9%)   | 316 (3.6%)   |
| Sepsis                             | 2030 (27.4%) | 4954 (22.3%)  | 1323 (30.5%) | 2269 (26.1%) |
| Severe sepsis                      | 1891 (25.5%) | 2642 (11.9%)  | 766 (17.7%)  | 1367 (15.7%) |

Categorical data are N (%) and continuous variables are presented as median [IQR]. IQR=interquartile range; RTRM=Real-time Risk Model;

CP=Convalescent Plasma; WHO PS=World Health Organization Progression Score

<sup>M</sup> indicates variables used for CEM matching

**Supplemental Table 3.** Admission and baseline biomarkers for WHO PS-matched model

|                                                | Pre-match CP      | Pre-match comparison | Post-match CP     | Post-match comparison |
|------------------------------------------------|-------------------|----------------------|-------------------|-----------------------|
| <b>Total number of patients, N</b>             | 7419              | 22234                | 4337              | 8708                  |
| <b>Admission biomarkers</b>                    |                   |                      |                   |                       |
| Absolute lymphocyte count x10 <sup>3</sup> /uL | 1.0 [0.7, 1.5]    | 1.0 [0.7, 1.5]       | 0.9 [0.6, 1.2]    | 1.0 [0.7, 1.3]        |
| Absolute neutrophil count x10 <sup>3</sup> /uL | 5.1 [3.4, 7.6]    | 5.1 [3.4, 7.6]       | 6.1 [4.1, 8.8]    | 6.2 [4.2, 8.9]        |
| Alanine aminotransferase units/L               | 31 [21, 51]       | 31 [21, 51]          | 39 [26, 62]       | 38 [26, 61]           |
| Aspartate aminotransferase units/L             | 38 [26, 59]       | 38 [26, 59]          | 48 [34, 70]       | 45 [32, 66]           |
| C reactive protein mg/dL                       | 7.1 [3.2, 13.2]   | 7.1 [3.3, 13.3]      | 11.0 [6.0, 17.7]  | 10.0 [5.3, 16.8]      |
| D-dimer ng/mL DDU                              | 485 [298, 881]    | 485 [298, 883]       | 458 [297, 788]    | 483 [302, 800]        |
| Ferritin ng/mL                                 | 385 [172, 808]    | 389 [174, 815]       | 572 [288, 1020]   | 532 [260, 1009]       |
| Hemoglobin A1c                                 | 6.8 [6.0, 9.0]    | 6.9 [6.0, 9.0]       | 7.0 [6.1, 9.3]    | 7.0 [6.1, 8.9]        |
| Interleukin-6 pg/mL                            | 37.2 [14.0, 89.0] | 37.4 [14.1, 90.2]    | 40.5 [16.9, 98.0] | 49.2 [17.0, 122.5]    |
| Lactic acid blood mmol/L                       | 1.4 [1.0, 1.9]    | 1.4 [1.1, 1.9]       | 1.5 [1.2, 1.9]    | 1.5 [1.2, 1.9]        |
| Lactate dehydrogenase – Serum/Plasma U/L       | 299 [225, 408]    | 300 [225, 411]       | 374 [287, 504]    | 365 [276, 488]        |

|                                                |                     |                      |                     |                     |
|------------------------------------------------|---------------------|----------------------|---------------------|---------------------|
| Procalcitonin ng/mL                            | 0.17 [0.09, 0.49]   | 0.17 [0.09, 0.50]    | 0.20 [0.10, 0.50]   | 0.2 [0.10, 0.53]    |
| Serum creatinine mg/dL                         | 1.00 [0.78, 1.40]   | 1.0 [0.78, 1.40]     | 0.97 [0.78, 1.24]   | 0.95 [0.75, 1.24]   |
| Total bilirubin mg/dL                          | 0.5 [0.4, 0.8]      | 0.5 [0.4, 0.8]       | 0.6 [0.4, 0.8]      | 0.6 [0.4, 0.8]      |
| Troponin I ng/mL                               | 0.03 [0.02, 0.09]   | 0.04 [0.02, 0.09]    | 0.03 [0.01, 0.07]   | 0.03 [0.01, 0.09]   |
| White blood cell count x10 <sup>3</sup> /uL    | 7.0 [5.1, 9.7]      | 6.9 [5.1, 9.7]       | 7.5 [5.5, 10.3]     | 7.8 [5.7, 10.8]     |
| <b>Baseline biomarkers</b>                     |                     |                      |                     |                     |
| Absolute lymphocyte count x10 <sup>3</sup> /uL | 1.0 [0.7, 1.5]      | 1.0 [0.7, 1.5]       | 0.9 [0.6, 1.2]      | 1.0 [0.6, 1.4]      |
| Absolute neutrophil count x10 <sup>3</sup> /uL | 5.4 [3.5, 8.5]      | 5.4 [3.5, 8.5]       | 7.9 [5.3, 10.9]     | 7.3 [4.7, 10.4]     |
| Alanine aminotransferase units/L               | 34 [21, 59]         | 34 [22, 59]          | 43 [28, 70]         | 42 [28, 70]         |
| Aspartate aminotransferase units/L             | 37 [25, 59]         | 37 [26, 59]          | 42 [29, 62]         | 40 [28, 61]         |
| C reactive protein mg/dL                       | 5.1 [2.3, 9.9]      | 5.1 [2.3, 10.0]      | 5.9 [3.0, 11.2]     | 5.4 [2.4, 10.9]     |
| D-dimer ng/mL DDU                              | 500 [298, 915]      | 500 [298, 915]       | 484 [290, 931]      | 478 [300, 895]      |
| Ferritin ng/mL                                 | 421 [195, 823]      | 424 [198, 828]       | 589 [324, 995]      | 530.84 [259, 959]   |
| Hemoglobin A1c                                 | 6.9 [6.0, 8.9]      | 6.9 [6.0, 9.0]       | 6.8 [6.2, 8.5]      | 7.1 [6.2, 8.8]      |
| Interleukin-6 pg/mL                            | 33.3 [10.8, 85.6]   | 33.2 [11.0, 85.6]    | 19.6 [7.0, 63.4]    | 46.4 [15.4, 179.9]  |
| Lactic acid blood mmol/L                       | 1.4 [1.0, 2.0]      | 1.4 [1.0, 2.0]       | 1.6 [1.2, 2.2]      | 1.7 [1.2, 2.3]      |
| Lactate dehydrogenase – serum/plasma U/L       | 293 [224, 403]      | 294 [224, 405]       | 369 [282, 518]      | 341 [259, 478]      |
| Procalcitonin ng/mL                            | 0.21 [0.09, 0.76]   | 0.21 [0.10, 0.77]    | 0.17 [0.08, 0.40]   | 0.20 [0.09, 0.54]   |
| Serum creatinine mg/dL                         | 0.87 [0.69, 1.20]   | 0.88 [0.70, 1.20]    | 0.80 [0.67, 1.01]   | 0.80 [0.65, 1.07]   |
| Total bilirubin mg/dL                          | 0.5 [0.3, 0.7]      | 0.5 [0.3, 0.7]       | 0.5 [0.4, 0.7]      | 0.5 [0.4, 0.6]      |
| Troponin I ng/mL                               | 0.08 [0.03, 0.27]   | 0.08 [0.03, 0.27]    | 0.08 [0.03, 0.49]   | 0.11 [0.03, 0.33]   |
| White blood cell count x10 <sup>3</sup> /uL    | 7.2 [5.1, 10.1]     | 7.2 [5.1, 10.1]      | 9.0 [6.4, 12.2]     | 8.6 [6.1, 12.0]     |
| <b>Admission oxygenation measures</b>          |                     |                      |                     |                     |
| Arterial blood partial pressure CO2            | 34.2 [30.0, 38.6]   | 34.6 [30.3, 39.2]    | 34.0 [30.4, 37.8]   | 33.9 [30.0, 38.4]   |
| Arterial blood partial pressure O2             | 68.6 [59.0, 84.2]   | 73.6 [62.0, 93.5]    | 68.6 [59.0, 83.5]   | 69.4 [60.0, 86.3]   |
| Blood pH                                       | 7.4 [7.4, 7.5]      | 7.4 [7.4, 7.5]       | 7.4 [7.4, 7.5]      | 7.4 [7.4, 7.5]      |
| PaO2/FiO2 ratio                                | 110.0 [71.0, 207.1] | 232.0 [121.7, 319.0] | 121.9 [74.3, 226.3] | 141.5 [77.0, 250.9] |
| Tidal volume mL                                | 480 [43, 550]       | 480 [420, 500]       | 471 [425, 552]      | 500 [433, 559]      |
| <b>Baseline oxygenation measures</b>           |                     |                      |                     |                     |
| Arterial blood partial pressure CO2            | 37.0 [32.4, 42.6]   | 36.1 [31.2, 41.9]    | 36.5 [32.3, 40.8]   | 36.1 [31.2, 41.7]   |
| Arterial blood partial pressure O2             | 69.6 [58.9, 87.5]   | 73.0 [61.2, 94.0]    | 69.0 [58.1, 83.2]   | 71.0 [60.72, 86.91] |
| Blood pH                                       | 7.4 [7.4, 7.5]      | 7.4 [7.4, 7.5]       | 7.4 [7.4, 7.5]      | 7.4 [7.4, 7.5]      |
| PaO2/FiO2 ratio                                | 89.6 [65.3, 141.9]  | 150.9 [86.3, 250.0]  | 88.8 [65.4, 137.7]  | 94.9 [70.2, 161.2]  |
| Tidal volume mL                                | 450 [420, 500]      | 450 [400, 500]       | 450 [400, 500]      | 500 [450, 504]      |

Categorical data are N (%) and continuous variables are presented as median [IQR]. IQR=interquartile range; RTRM=Real-time Risk Model;

CP=Convalescent Plasma

**Supplemental Table 4.** Demographic description of epoch intervals.

|                                        | <b>All eligible patients</b> | <b>Epoch 1</b> | <b>Epoch 2</b> | <b>Epoch 3</b> | <b>Epoch 4</b> | <b>Epoch 5</b> | <b>Epoch 6</b> |
|----------------------------------------|------------------------------|----------------|----------------|----------------|----------------|----------------|----------------|
| <b>Total number of patients, N</b>     | 33987                        | 1380           | 2668           | 1585           | 8527           | 15753          | 4074           |
| <b>Number of CP patients, N</b>        | 8034                         | 10             | 158            | 260            | 2173           | 4281           | 1152           |
| <b>Age groupings</b>                   |                              |                |                |                |                |                |                |
| 18-44                                  | 5734 (16.9%)                 | 215 (15.6%)    | 370 (13.9%)    | 277 (17.5%)    | 1821 (21.4%)   | 2435 (15.5%)   | 616 (15.1%)    |
| 45-64                                  | 11481 (33.8%)                | 523 (37.9%)    | 878 (32.9%)    | 526 (33.2%)    | 3141 (36.8%)   | 5143 (32.6%)   | 1270 (31.2%)   |
| 65-74                                  | 6942 (20.4%)                 | 298 (21.6%)    | 545 (20.4%)    | 292 (18.4%)    | 1551 (18.2%)   | 3378 (21.4%)   | 878 (21.6%)    |
| 75-84                                  | 5961 (17.5%)                 | 208 (15.1%)    | 477 (17.9%)    | 272 (17.2%)    | 1229 (14.4%)   | 2956 (18.8%)   | 819 (20.1%)    |
| 85+                                    | 3862 (11.4%)                 | 135 (9.8%)     | 398 (14.9%)    | 217 (13.7%)    | 783 (9.2%)     | 1838 (11.7%)   | 491 (12.1%)    |
| <b>Race/ethnicity</b>                  |                              |                |                |                |                |                |                |
| Hispanic                               | 11040 (32.5%)                | 290 (21%)      | 664 (24.9%)    | 483 (30.5%)    | 3510 (41.2%)   | 5121 (32.5%)   | 972 (23.9%)    |
| Non-Hispanic black                     | 6479 (19.1%)                 | 389 (28.2%)    | 600 (22.5%)    | 324 (20.4%)    | 1522 (17.8%)   | 2985 (18.9%)   | 659 (16.2%)    |
| Non-Hispanic other                     | 1810 (5.3%)                  | 97 (7%)        | 200 (7.5%)     | 101 (6.4%)     | 463 (5.4%)     | 763 (4.8%)     | 186 (4.6%)     |
| Non-Hispanic white                     | 11823 (34.8%)                | 481 (34.9%)    | 1011 (37.9%)   | 534 (33.7%)    | 2375 (27.9%)   | 5585 (35.5%)   | 1837 (45.1%)   |
| <b>Sex</b>                             |                              |                |                |                |                |                |                |
| Female                                 | 16430 (48.3%)                | 645 (46.7%)    | 1298 (48.7%)   | 755 (47.6%)    | 4052 (47.5%)   | 7635 (48.5%)   | 2045 (50.2%)   |
| Male                                   | 17547 (51.6%)                | 734 (53.2%)    | 1370 (51.3%)   | 829 (52.3%)    | 4473 (52.5%)   | 8113 (51.5%)   | 2028 (49.8%)   |
| Unknown                                | 3 (0%)                       | 0 (0%)         | 0 (0%)         | 0 (0%)         | 0 (0%)         | 2 (0%)         | 1 (0%)         |
| <b>Pre-admission comorbidities</b>     |                              |                |                |                |                |                |                |
| Asthma or reactive airway disease      | 3251 (9.6%)                  | 165 (12%)      | 283 (10.6%)    | 139 (8.8%)     | 802 (9.4%)     | 1468 (9.3%)    | 394 (9.7%)     |
| COPD (excluding asthma)                | 6615 (19.5%)                 | 260 (18.8%)    | 542 (20.3%)    | 325 (20.5%)    | 1410 (16.5%)   | 3240 (20.6%)   | 838 (20.6%)    |
| Autoimmune disorders total             | 4008 (11.8%)                 | 154 (11.2%)    | 363 (13.6%)    | 204 (12.9%)    | 905 (10.6%)    | 1865 (11.8%)   | 517 (12.7%)    |
| Organ-related autoimmune disorders     | 2390 (7%)                    | 91 (6.6%)      | 207 (7.8%)     | 131 (8.3%)     | 516 (6.1%)     | 1156 (7.3%)    | 289 (7.1%)     |
| Systemic autoimmune disorders          | 1956 (5.8%)                  | 78 (5.7%)      | 182 (6.8%)     | 95 (6.0%)      | 469 (5.5%)     | 865 (5.5%)     | 267 (6.6%)     |
| Cancer                                 | 2021 (5.9%)                  | 83 (6.0%)      | 182 (6.8%)     | 76 (4.8%)      | 441 (5.2%)     | 969 (6.2%)     | 270 (6.6%)     |
| Cancer (diagnosed in the last 2 years) | 1132 (3.3%)                  | 43 (3.1%)      | 106 (4%)       | 41 (2.6%)      | 254 (3.0%)     | 538 (3.4%)     | 150 (3.7%)     |

|                                        |               |             |              |             |              |               |              |
|----------------------------------------|---------------|-------------|--------------|-------------|--------------|---------------|--------------|
| Chronic ischemic heart disease         | 7257 (21.4%)  | 269 (19.5%) | 599 (22.5%)  | 354 (22.3%) | 1512 (17.7%) | 3572 (22.7%)  | 951 (23.3%)  |
| Congestive heart failure               | 6481 (19.1%)  | 245 (17.8%) | 616 (23.1%)  | 309 (19.5%) | 1367 (16%)   | 3101 (19.7%)  | 843 (20.7%)  |
| Diabetes total                         | 13545 (39.9%) | 539 (39.1%) | 1128 (42.3%) | 608 (38.4%) | 3235 (37.9%) | 6507 (41.3%)  | 1528 (37.5%) |
| Diabetes with chronic complications    | 6154 (18.1%)  | 232 (16.8%) | 517 (19.4%)  | 300 (18.9%) | 1312 (15.4%) | 3056 (19.4%)  | 737 (18.1%)  |
| Diabetes without chronic complications | 7391 (21.7%)  | 307 (22.2%) | 611 (22.9%)  | 308 (19.4%) | 1923 (22.6%) | 3451 (21.9%)  | 791 (19.4%)  |
| HIV infection                          | 171 (0.5%)    | 8 (0.6%)    | 16 (0.6%)    | 11 (0.7%)   | 56 (0.7%)    | 73 (0.5%)     | 7 (0.2%)     |
| Hypertension                           | 21368 (62.9%) | 951 (68.9%) | 1825 (68.4%) | 996 (62.8%) | 4977 (58.4%) | 10059 (63.9%) | 2560 (62.8%) |
| Renal disease (mild or moderate)       | 5497 (16.2%)  | 230 (16.7%) | 486 (18.2%)  | 271 (17.1%) | 1147 (13.5%) | 2666 (16.9%)  | 697 (17.1%)  |
| Renal disease (severe)                 | 2021 (5.9%)   | 77 (5.6%)   | 187 (7%)     | 117 (7.4%)  | 440 (5.2%)   | 991 (6.3%)    | 209 (5.1%)   |

Data are N (%) unless otherwise indicated. Epochs were all in 2020 and were defined as follows based on changes in treatment recommendations: Epoch 1, March 1 to April 2; Epoch 2, April 3 to April 29; Epoch 3, April 30 to May 19; Epoch 4, May 20 to July 5; Epoch 5, July 6 to August 23; Epoch 6, August 24 to September 28. CP=Convalescent Plasma; COPD=Chronic obstructive pulmonary disease

**Supplemental Table 5.** Clinical description of epoch intervals.

|                                    | <b>All eligible patients</b> | <b>EPOCH 1</b> | <b>EPOCH 2</b> | <b>EPOCH 3</b> | <b>EPOCH 4</b> | <b>EPOCH 5</b> | <b>EPOCH 6</b> |
|------------------------------------|------------------------------|----------------|----------------|----------------|----------------|----------------|----------------|
| <b>Total number of patients, N</b> | 33987                        | 1380           | 2668           | 1585           | 8527           | 15753          | 4074           |
| <b>Number of CP patients, N</b>    | 8034                         | 10             | 158            | 260            | 2173           | 4281           | 1152           |
| <b>Medications</b>                 |                              |                |                |                |                |                |                |
| Anticoagulants                     | 29233 (86.0%)                | 1020 (73.9%)   | 2161 (81%)     | 1357 (85.6%)   | 7569 (88.8%)   | 13835 (87.8%)  | 3291 (80.8%)   |
| Azithromycin                       | 21167 (62.3%)                | 1140 (82.6%)   | 1846 (69.2%)   | 976 (61.6%)    | 5475 (64.2%)   | 9584 (60.8%)   | 2146 (52.7%)   |
| Antibiotics – other                | 27507 (80.9%)                | 1196 (86.7%)   | 2185 (81.9%)   | 1301 (82.1%)   | 7100 (83.3%)   | 12703 (80.6%)  | 3022 (74.2%)   |
| Antivirals                         | 697 (2.1%)                   | 134 (9.7%)     | 91 (3.4%)      | 39 (2.5%)      | 152 (1.8%)     | 241 (1.5%)     | 40 (1.0%)      |
| Hydroxychloroquine                 | 3282 (9.7%)                  | 793 (57.5%)    | 1435 (53.8%)   | 413 (26.1%)    | 342 (4.0%)     | 265 (1.7%)     | 34 (0.8%)      |
| Remdesivir                         | 8303 (24.4%)                 | 11 (0.8%)      | 41 (1.5%)      | 136 (8.6%)     | 2510 (29.4%)   | 4389 (27.9%)   | 1216 (29.8%)   |
| Tocilizumab                        | 1466 (4.3%)                  | 26 (1.9%)      | 179 (6.7%)     | 131 (8.3%)     | 574 (6.7%)     | 549 (3.5%)     | 7 (0.2%)       |
| Statins/ACE inhibitors (ACEi)      | 12100 (35.6%)                | 476 (34.5%)    | 1033 (38.7%)   | 576 (36.3%)    | 2746 (32.2%)   | 5771 (36.6%)   | 1498 (36.8%)   |
| Steroids                           | 21690 (63.8%)                | 290 (21.0%)    | 699 (26.2%)    | 482 (30.4%)    | 5437 (63.8%)   | 11967 (76.0%)  | 2815 (69.1%)   |
| Immunomodulators – other           | 37 (0.1%)                    | 2 (0.1%)       | 4 (0.1%)       | 2 (0.1%)       | 12 (0.1%)      | 13 (0.1%)      | 4 (0.1%)       |
| <b>Clinical variables</b>          |                              |                |                |                |                |                |                |

|                                              |               |             |              |             |              |              |              |
|----------------------------------------------|---------------|-------------|--------------|-------------|--------------|--------------|--------------|
| Days to transfusion (CP only), <i>M (SD)</i> | 4.0 (3.7)     | 20.9 (4.9)  | 8.8 (6.4)    | 4.4 (3.4)   | 4.4 (4.0)    | 4.0 (3.4)    | 2.4 (2.1)    |
| Length of stay, <i>M (SD)</i>                | 9.5 (9.2)     | 10.6 (11.7) | 11.4 (11.9)  | 11.3 (10.5) | 10.2 (10.2)  | 9.3 (8.4)    | 6.8 (5.2)    |
| Intubation                                   | 2277 (6.7%)   | 156 (11.3%) | 203 (7.6%)   | 104 (6.6%)  | 608 (7.1%)   | 1053 (6.7%)  | 153 (3.8%)   |
| All cause death                              | 3431 (10.1%)  | 158 (11.4%) | 310 (11.6%)  | 134 (8.5%)  | 827 (9.7%)   | 1692 (10.7%) | 310 (7.6%)   |
| <b>Admission WHO PS</b>                      |               |             |              |             |              |              |              |
| WHO PS 2                                     | 9572 (28.2%)  | 413 (29.9%) | 741 (27.8%)  | 479 (30.2%) | 2482 (29.1%) | 4262 (27.1%) | 1195 (29.3%) |
| WHO PS 3                                     | 16489 (48.5%) | 762 (55.2%) | 1454 (54.5%) | 796 (50.2%) | 4106 (48.2%) | 7498 (47.6%) | 1873 (46%)   |
| WHO PS 4                                     | 5237 (15.4%)  | 87 (6.3%)   | 288 (10.8%)  | 191 (12.1%) | 1318 (15.5%) | 2787 (17.7%) | 566 (13.9%)  |
| WHO PS 5                                     | 539 (1.6%)    | 57 (4.1%)   | 56 (2.1%)    | 21 (1.3%)   | 127 (1.5%)   | 228 (1.4%)   | 50 (1.2%)    |
| Missing                                      | 2150 (6.3%)   | 61 (4.4%)   | 129 (4.8%)   | 98 (6.2%)   | 494 (5.8%)   | 978 (6.2%)   | 390 (9.6%)   |
| <b>Baseline WHO PS</b>                       |               |             |              |             |              |              |              |
| WHO PS 2                                     | 8108 (23.9%)  | 288 (20.9%) | 669 (25.1%)  | 403 (25.4%) | 2046 (24%)   | 3596 (22.8%) | 1106 (27.1%) |
| WHO PS 3                                     | 14853 (43.7%) | 695 (50.4%) | 1288 (48.3%) | 712 (44.9%) | 3637 (42.7%) | 6772 (43%)   | 1749 (42.9%) |
| WHO PS 4                                     | 7489 (22%)    | 148 (10.7%) | 390 (14.6%)  | 302 (19.1%) | 2032 (23.8%) | 3862 (24.5%) | 755 (18.5%)  |
| WHO PS 5                                     | 1331 (3.9%)   | 172 (12.5%) | 177 (6.6%)   | 57 (3.6%)   | 320 (3.8%)   | 540 (3.4%)   | 65 (1.6%)    |
| Missing                                      | 2206 (6.5%)   | 77 (5.6%)   | 144 (5.4%)   | 111 (7.0%)  | 492 (5.8%)   | 983 (6.2%)   | 399 (9.8%)   |
| <b>Secondary infections</b>                  |               |             |              |             |              |              |              |
| Bacteremia                                   | 221 (0.7%)    | 7 (0.5%)    | 15 (0.6%)    | 12 (0.8%)   | 44 (0.5%)    | 115 (0.7%)   | 28 (0.7%)    |
| Bacterial pneumonia                          | 1218 (3.6%)   | 87 (6.3%)   | 115 (4.3%)   | 61 (3.8%)   | 294 (3.4%)   | 538 (3.4%)   | 123 (3.0%)   |
| Sepsis                                       | 7756 (22.8%)  | 321 (23.3%) | 637 (23.9%)  | 393 (24.8%) | 2041 (23.9%) | 3515 (22.3%) | 849 (20.8%)  |
| Severe sepsis                                | 5045 (14.8%)  | 255 (18.5%) | 501 (18.8%)  | 243 (15.3%) | 1226 (14.4%) | 2288 (14.5%) | 532 (13.1%)  |

Data are N (%) unless otherwise indicated. Epochs were all in 2020 and were defined as follows based on changes in treatment recommendations: Epoch 1, March 1 to April 2; Epoch 2, April 3 to April 29; Epoch 3, April 30 to May 19; Epoch 4, May 20 to July 5; Epoch 5, July 6 to August 23; Epoch 6, August 24 to September 28. CP=Convalescent Plasma; WHO PS=World Health Organization Progression Score

**Supplemental Table 6.** Transfusion related adverse events.

|                                                                                                                                          | All CP     | Verified FFP | Non-CP, Non-FFP |
|------------------------------------------------------------------------------------------------------------------------------------------|------------|--------------|-----------------|
| <b>Total number of patients, N</b>                                                                                                       | 8034       | 572          | 25953           |
| <b>Transfusion-related acute lung injury (TRALI)<sup>†</sup></b><br>ICD10 J95.84                                                         | 5 (0.06%)  | 1 (0.17%)    | 0 (0.00%)       |
| <b>Transfusion-associated circulatory overload (TACO)</b><br>ICD10 E87.71                                                                | 0 (0.00%)  | 0 (0.00%)    | 1 (0.004%)      |
| <b>Transfusion related infection</b><br>ICD10 T80.21, T80.22, T80.29, T80.29X                                                            | 7 (0.09%)  | 2 (0.35%)    | 20 (0.08%)      |
| <b>Thromboembolic/thrombotic event</b><br>ICD10 T80.1, T81.72, T82.90                                                                    | 2 (0.02%)  | 0 (0.00%)    | 3 (0.01%)       |
| <b>Severe allergic transfusion reaction</b><br>ICD10 T80.69                                                                              | 0 (0.00%)  | 0 (0.00%)    | 0 (0.00%)       |
| <b>Severe hemolytic transfusion reaction</b><br>ICD10 T80.310, T80.311, T80.319, T80.410,<br>T80.411, T80.419, T80.A10, T80.A11, T80.A19 | 0 (0.00%)  | 0 (0.00%)    | 0 (0.00%)       |
| <b>Transfusion related severe anaphylaxis</b><br>ICD10 T80.51                                                                            | 0 (0.00%)  | 0 (0.00%)    | 0 (0.00%)       |
| <b>Transfusion related adverse event - unspecified</b><br>ICD10 T80.89, T80.92                                                           | 5 (0.06%)  | 2 (0.35%)    | 5 (0.02%)       |
| <b>Total transfusion related adverse events</b>                                                                                          | 19 (0.23%) | 5 (0.87%)    | 29 (0.11%)      |

Adverse events related to transfusion are reported for three subgroups including eligible patients transfused with CP, patients transfused with verified fresh frozen plasma (FFP), or eligible patients who received neither CP nor FFP. All CP=CP transfusion within the eligible patient pool of 33,987. Verified FFP=fresh frozen plasma transfusion defined by either having no detectable SARS-CoV-2 antibodies (S/Co $\leq$ 1) or was designated an FFP blood product by suppliers and donated prior to January 1, 2020. Non-CP, Non-FFP=patients who did not receive a transfusion blood product of either CP or FFP, yet other blood product transfusions cannot be ruled out (representative of the comparison cohort). Transfusion related adverse events are obtained by passive reporting and not manually validated; thus, reported rates may systematically underestimate the actual incidence across all groups. <sup>†</sup>, TRALI rates may be an overestimate because the imputability of reported TRALI events is unknown.

**Supplemental Table 7.** Effects and interactions of donor serology in the CP cohort.

|                                                         | <b>HR</b> | <b>LLCI</b> | <b>ULCI</b> | <b>p-value</b>   |
|---------------------------------------------------------|-----------|-------------|-------------|------------------|
| <b>Continuous S/Co levels</b>                           |           |             |             |                  |
| Donor serology                                          | 0.999     | 0.999       | 1.000       | 0.084            |
| <b>Categorical S/Co levels</b>                          |           |             |             |                  |
| Low (below 20 <sup>th</sup> percentile) <sup>R</sup>    | --        | --          | --          | --               |
| Medium (20 <sup>th</sup> – 80 <sup>th</sup> percentile) | 0.864     | 0.657       | 1.137       | 0.297            |
| High (above 80 <sup>th</sup> percentile)                | 0.777     | 0.548       | 1.101       | 0.155            |
| <b>S/Co Levels by days to transfusion</b>               |           |             |             |                  |
| Donor serology                                          | 0.998     | 0.997       | 0.999       | <b>0.013</b>     |
| Days to transfusion                                     | 1.036     | 1.002       | 1.071       | <b>0.037</b>     |
| Donor serology * days to transfusion                    | 1.0002    | 1.0000      | 1.0004      | <b>0.044</b>     |
| <b>Effects from simple slopes by serology</b>           |           |             |             |                  |
| Low donor serology: days to transfusion                 | 1.043     | 1.014       | 1.073       | <b>0.003</b>     |
| High donor serology: days to transfusion                | 1.097     | 1.056       | 1.139       | <b>&lt;0.001</b> |
| <b>Effects from simple slopes by days</b>               |           |             |             |                  |
| 0-3 days: donor serology                                | 0.998     | 0.997       | 0.999       | <b>0.029</b>     |
| 4+ days: donor serology                                 | 1.000     | 0.999       | 1.001       | 0.736            |

For cases where patients received more than one CP transfusion within 1 week of their first CP transfusion, the serologic levels were averaged to create one serologic level per patient.

HR=hazard ratio, LLCI=lower limit confidence interval, ULCI=upper limit confidence interval

<sup>R</sup> represents the reference variable for the categorical S/Co serology levels. N=1944

Five patients with erroneous admission dates removed for all results that included Days to Transfusion. N=1939  
 Simple slope analyses were conducted for the decomposition of the significant interaction; the transformed scores were centered by mean±SD (178.21±138.49, N=1939) to examine the impact of high serology versus low serology across number of days from admission to transfusion as separate models.

**Supplemental Table 8.** Medication list by categories

| <b>Medication categories</b>  | <b>List of included medications</b>                                                                                                                                                                                                                                                                                                                                                                                                                                                                                                                                                                                                                                                                                                                                                                                    |
|-------------------------------|------------------------------------------------------------------------------------------------------------------------------------------------------------------------------------------------------------------------------------------------------------------------------------------------------------------------------------------------------------------------------------------------------------------------------------------------------------------------------------------------------------------------------------------------------------------------------------------------------------------------------------------------------------------------------------------------------------------------------------------------------------------------------------------------------------------------|
| Anticoagulants                | anticoagulant, acd, argatroban, arixtra, coumadin, eliquis, enoxaparin, heparin, lovenox, fondaparinux, warfarin, apixaban                                                                                                                                                                                                                                                                                                                                                                                                                                                                                                                                                                                                                                                                                             |
| Tocilizumab                   | actemra, tocilizumab                                                                                                                                                                                                                                                                                                                                                                                                                                                                                                                                                                                                                                                                                                                                                                                                   |
| Azithromycin                  | azithromycin, zithromax, zmax                                                                                                                                                                                                                                                                                                                                                                                                                                                                                                                                                                                                                                                                                                                                                                                          |
| Statins/ACE inhibitors (ACEi) | Statins: statin, crestor, lipitor, pravachol, pravastatin, rosuvastatin, zocor, atorvastatin, simvastatin<br>ACEi: ACE, ramipril, capoten, prinivil, vasotec, zestril, captopril, lisinopril, enalapril                                                                                                                                                                                                                                                                                                                                                                                                                                                                                                                                                                                                                |
| Steroids                      | steroid, corticosteroid, cortef, hydrocortisone, decadron, dexamethasone, deltasone, prednisone, deltasone, solu-cortef, hydrocortisone, solu-medrol, methylprednisolone                                                                                                                                                                                                                                                                                                                                                                                                                                                                                                                                                                                                                                               |
| Other immunomodulators        | imuran, myfortic, azathioprine, mycophenolic                                                                                                                                                                                                                                                                                                                                                                                                                                                                                                                                                                                                                                                                                                                                                                           |
| Hydroxychloroquine            | plaquenil, hydroxychloroquine                                                                                                                                                                                                                                                                                                                                                                                                                                                                                                                                                                                                                                                                                                                                                                                          |
| Remdesivir                    | remdesivir, veklury                                                                                                                                                                                                                                                                                                                                                                                                                                                                                                                                                                                                                                                                                                                                                                                                    |
| Antivirals                    | antiviral, acyclovir, zovirax, abacavir, kivexa, ziagen, epzicom, trizivir, triumeq, tamiflu, oseltamivir, nrti, epivir, lamivudine                                                                                                                                                                                                                                                                                                                                                                                                                                                                                                                                                                                                                                                                                    |
| Other antibiotics             | amoxicillin, amoxil, augmentin, moxatag, ampicillin, principen, unasyn, oxacillin, penicillin, pfizerpen, bicillin, ancef, cefazolin, cefepime, maxipime, ceftin, cefuroxime, cefdinir, omnicef, fortaz, ceftazidime, keflex, cephalixin, kefzol, rocephin, ceftriaxone, zerbaxa, ceftolozane, cephalosporin, azactam, aztreona, monobactam, bactrim, trimethoprim, sulfonamide, cipro, ciprofloxacin, levaquin, levofloxacin, fluoroquinolone, cleocin, clindamycin, lincosamide, cubicin, daptomycin, flagyl, metronidazole, invanz, ertapenem, merrem, meropenem, carbapenem, macrobid, nitrofurantoin, macrodantin, nebcin, aminoglycoside, sulfamethoxazole, gantanol, sulfatrim, zotrim, vancocin, vancomycin, firvanq, xifaxan, rifaximin, rifamycin, rimactane, aemcolo, zosyn, piperacillin, zyvox, linezolid |



**Supplemental Table 9.** Calendar epoch intervals

| <b>Epoch</b> | <b>Calendar definitions</b>    | <b>Summary of treatment recommendations</b>                                                                                                                                        |
|--------------|--------------------------------|------------------------------------------------------------------------------------------------------------------------------------------------------------------------------------|
| Epoch 1      | March 2 – April 2, 2020        | <ul style="list-style-type: none"> <li>• Consider only hydroxychloroquine without azithromycin</li> <li>• Consider remdesivir</li> <li>• Avoid steroids</li> </ul>                 |
| Epoch 2      | April 3 – April 29, 2020       | <ul style="list-style-type: none"> <li>• Consider hydroxychloroquine with azithromycin</li> <li>• Consider tocilizumab</li> <li>• Consider convalescent plasma</li> </ul>          |
| Epoch 3      | April 30 – May 19, 2020        | <ul style="list-style-type: none"> <li>• Consider only hydroxychloroquine, no azithromycin</li> <li>• Consider low-dose, short-course steroids in later pulmonary phase</li> </ul> |
| Epoch 4      | May 20 – July 5, 2020          | <ul style="list-style-type: none"> <li>• Do not consider hydroxychloroquine</li> </ul>                                                                                             |
| Epoch 5      | July 6 – August 23, 2020       | <ul style="list-style-type: none"> <li>• Steroids recommended for all patients requiring oxygen supplementation</li> </ul>                                                         |
| Epoch 6      | August 24 – September 28, 2020 | <ul style="list-style-type: none"> <li>• Consider convalescent plasma for patients with lesser severity illness<sup>#</sup></li> </ul>                                             |

#Shift in treatment recommendation for convalescent plasma from patient with more severe disease to patients with less severe disease based on the shift from the expanded access program (EAP) requirements to the emergency use authorization (EUA) (4).

**Supplemental Table 10.** WHO progression score (WHO PS) categories.

| <b>WHO PS</b> | <b>Description</b>                                                                                                                                  |
|---------------|-----------------------------------------------------------------------------------------------------------------------------------------------------|
| 1             | Discharged alive                                                                                                                                    |
| 2             | Hospitalized with no supplemental oxygen                                                                                                            |
| 3             | Hospitalized on low-flow supplemental oxygen                                                                                                        |
| 4             | Hospitalized on non-invasive or high-flow oxygen including continuous positive airway pressure (CPAP) and bi-level positive airway pressure (BIPAP) |
| 5             | Hospitalized on invasive mechanical ventilation or extracorporeal membrane oxygenation (ECMO)                                                       |
| 6             | Expired                                                                                                                                             |

The WHO PS is a modified 6-point scale, adapted from the WHO R&D Blueprint group to assess disease severity and measure clinical improvement in hospitalized patients. Patients were assigned a daily WHO PS based on their most severe status that day, except at discharge which was assigned 1 (4).
